# Supplementary material for: Protein III-Based Single-Chain Antibody Phage Display Using Bacterial Cells Bearing an Additional Genome of a Gene-III-Lacking Helper Phage
Source: Atypon-hosted journal article supplement (doi:10.2144/000112461), 2007-06-01
Supplement: 112461_supplement1_p_41260a.pdf [file 112461_supplement1_p_41260a.pdf]

SUPPLEMENTARY MATERIAL FOR:

# Protein III-based single-chain antibody phage display using bacterial cells bearing an additional genome of a gene-III-lacking helper phage

Bizhi Shi<sup>1</sup>, Huamao Wang<sup>1,2</sup>, Shengrong Guo<sup>1</sup>, Yuhong Xu<sup>1</sup>, Zonghai Li<sup>1</sup>, and Jianren Gu<sup>1</sup>

*BioTechniques* 42:760-765 (June 2007)

maqiqlqsgpelvkgasvkisckasgyftnylnwvkqkpgqglewigwiypngkteynekfkgkatltvdtssntayiqllsstedavyfcarlittaidvlgagttv  
tvssgggsgggsgggsgggdivmsqspaimsaspekvmtcsassvsymhfwqkpgtspklwiystnlasgvparfsgsgsgtsysltisrmeadaatyycqqrss  
ypptfgsgtrleikr

**Supplementary Data S1.** The amino acid sequence of the single-chain variable fragment (scFv) encoding by pCANTAB-5ET-19.

---

<sup>1</sup>Shanghai Cancer Institute, Shanghai and <sup>2</sup>Shanghai Medical College Fudan University, Shanghai, China

**Supplementary Table S1. Primers for Mouse Single-Chain Variable (scFv) Library**

|                                                                                                                                                                                                                                                                               |                                                                             |
|-------------------------------------------------------------------------------------------------------------------------------------------------------------------------------------------------------------------------------------------------------------------------------|-----------------------------------------------------------------------------|
| <b>A. Primers for Generating V<sub>H</sub>-Linker</b>                                                                                                                                                                                                                         |                                                                             |
| Upstream Primer Sequence                                                                                                                                                                                                                                                      |                                                                             |
| OP1                                                                                                                                                                                                                                                                           | 5'- <b>ACTGCGGCCAGCCGGCC</b> ATGGCCGAGGTGCAGCTTSAGGARTCAGG-3'               |
| OP2                                                                                                                                                                                                                                                                           | 5'- <b>ACTGCGGCCAGCCGGCC</b> ATGGCCGATGTGCAGCTTSAGGAGYCRGG-3'               |
| OP3                                                                                                                                                                                                                                                                           | 5'- <b>ACTGCGGCCAGCCGGCC</b> ATGGCCCAGGTGCAGCTGAAGSAGYCAGG-3'               |
| OP4                                                                                                                                                                                                                                                                           | 5'- <b>ACTGCGGCCAGCCGGCC</b> ATGGCCGAGGTYCAGCTGSARCARTCTGG-3'               |
| OP5                                                                                                                                                                                                                                                                           | 5'- <b>ACTGCGGCCAGCCGGCC</b> ATGGCCCAGGTYCARCTGCARCAGYCTGG-3'               |
| OP6                                                                                                                                                                                                                                                                           | 5'- <b>ACTGCGGCCAGCCGGCC</b> ATGGCCGARGTGAAGCTGSTGGARTCTGG-3'               |
| OP7                                                                                                                                                                                                                                                                           | 5'- <b>ACTGCGGCCAGCCGGCC</b> ATGGCCGAGGTTTCAGCTTCAGCAGWCTGG-3'              |
| OP8                                                                                                                                                                                                                                                                           | 5'- <b>ACTGCGGCCAGCCGGCC</b> ATGGCCGAAGTGCAGCTGKTGGAGWCTGG-3'               |
| OP9                                                                                                                                                                                                                                                                           | 5'- <b>ACTGCGGCCAGCCGGCC</b> ATGGCCCAGATCCAGTTGCTGCAGYCTGG-3'               |
| Downstream Primer Sequence                                                                                                                                                                                                                                                    |                                                                             |
| OP10                                                                                                                                                                                                                                                                          | 5'- <b>GCCAGAGCCACCTCCGCCTGA</b> ACCGCCTCCACCTGAGGAGACGGTGACCGTRGTCCC-3'    |
| OP11                                                                                                                                                                                                                                                                          | 5'- <b>GCCAGAGCCACCTCCGCCTGA</b> ACCGCCTCCACCTGAGGAGACTGTGASAGTGGTGCC-3'    |
| OP12                                                                                                                                                                                                                                                                          | 5'- <b>GCCAGAGCCACCTCCGCCTGA</b> ACCGCCTCCACCTGCAGAGACAGTGACCAG-3'          |
| OP13                                                                                                                                                                                                                                                                          | 5'- <b>GCCAGAGCCACCTCCGCCTGA</b> ACCGCCTCCACCTGAGGAGACGGTGASTGAGGTTCC-3'    |
| <b>B. Primers for Generating κ Light Chain</b>                                                                                                                                                                                                                                |                                                                             |
| Upstream Primer Sequence                                                                                                                                                                                                                                                      |                                                                             |
| OP14                                                                                                                                                                                                                                                                          | 5'- <b>TTCAGGCGGAGGTGGCTCTGGC</b> GGTGGCGGATCGGACATTGTGATGWACAGWCTCC-3'     |
| OP15                                                                                                                                                                                                                                                                          | 5'- <b>TTCAGGCGGAGGTGGCTCTGGC</b> GGTGGCGGATCGGATGTTKTGATRACCCAACTCC-3'     |
| OP16                                                                                                                                                                                                                                                                          | 5'- <b>TTCAGGCGGAGGTGGCTCTGGC</b> GGTGGCGGATCGGATATTGTGATRACBCAGGCWGC-3'    |
| OP17                                                                                                                                                                                                                                                                          | 5'- <b>TTCAGGCGGAGGTGGCTCTGGC</b> GGTGGCGGATCGGACATTGTGCTGACMCARTCTCC-3'    |
| OP18                                                                                                                                                                                                                                                                          | 5'- <b>TTCAGGCGGAGGTGGCTCTGGC</b> GGTGGCGGATCGSAAAWTGTKTSACCCAGTCWCC-3'     |
| OP19                                                                                                                                                                                                                                                                          | 5'- <b>TTCAGGCGGAGGTGGCTCTGGC</b> GGTGGCGGATCGGAYATYVWGATGACMCAGWCTCC-3'    |
| OP20                                                                                                                                                                                                                                                                          | 5'- <b>TTCAGGCGGAGGTGGCTCTGGC</b> GGTGGCGGATCGCAAATTGTTCTCACSCAGTCWCC-3'    |
| OP21                                                                                                                                                                                                                                                                          | 5'- <b>TTCAGGCGGAGGTGGCTCTGGC</b> GGTGGCGGATCGTCATTATTGCASGTGCTTGTGGG-3'    |
| Downstream Primer Sequence                                                                                                                                                                                                                                                    |                                                                             |
| OP22                                                                                                                                                                                                                                                                          | 5'- <b>GTCATTCTGCGGCCGCCGTTT</b> GATTTCAGCTTGGTGCCWCC-3'                    |
| OP23                                                                                                                                                                                                                                                                          | 5'- <b>GTCATTCTGCGGCCGCCGTTT</b> TATTTCCAGCTTGGTSCCCCC-3'                   |
| OP24                                                                                                                                                                                                                                                                          | 5'- <b>GTCATTCTGCGGCCGCCGTTT</b> TATTTCCAGTCTGGTCCCATC-3'                   |
| OP25                                                                                                                                                                                                                                                                          | 5'- <b>GTCATTCTGCGGCCGCCGTTT</b> TATTTCCAACCTTGTMCCGA-3'                    |
| OP26                                                                                                                                                                                                                                                                          | 5'- <b>GTCATTCTGCGGCCGCCGTTT</b> CAGCTCCAGCTTGGTSCCAGC-3'                   |
| <b>C. Primers for Generating V<sub>λ</sub> Fragments</b>                                                                                                                                                                                                                      |                                                                             |
| Upstream Primer Sequence                                                                                                                                                                                                                                                      |                                                                             |
| OP27                                                                                                                                                                                                                                                                          | 5'- <b>TTCAGGCGGAGGTGGCTCTGGC</b> GGTGGCGGATCGCAGGATGCTGTTGTGACTCAGGAATC-3' |
| Downstream Primer Sequence                                                                                                                                                                                                                                                    |                                                                             |
| OP28                                                                                                                                                                                                                                                                          | 5'- <b>GTCATTCTGCGGCCGCCGTTT</b> ACCTAGGACAGTSAGYTTGG-3'                    |
| <b>D. Adaptor Primers</b>                                                                                                                                                                                                                                                     |                                                                             |
| Linker with Heavy Chains: OP29                                                                                                                                                                                                                                                | 5'-GTCCTCGCA <b>ACTGCGGCCAGCCGGCCATGGCC</b> -3'                             |
| Linker with Light Chains: OP30                                                                                                                                                                                                                                                | 5'-TGAGT <b>CATTCTGCGGCCGCCGTTT</b> -3'                                     |
| <p>The linker sequence is indicated in bold. Underlined italics indicate restriction sites for cloning. M = A or C; R = A or G; W = A or T; S = C or G; Y = C or T; K = G or T; V = A or C or G; H = A or C or T; D = A or G or T; B = C or G or T; N = G or A or T or C.</p> |                                                                             |
